# Supplementary material
Source: PubMed Central journal article supplement (PMC6629118)

**SUPPLEMENTARY MATERIAL FOR:**

**A glucose-dependent spatial patterning of exocytosis in human  $\beta$ -cells is disrupted in type 2 diabetes**

Jiayang Fu<sup>1</sup>, John Maringa Githaka<sup>2</sup>, Xiaoqing Dai<sup>1</sup>, Gregory Plummer<sup>1</sup>, Kunimasa Suzuki<sup>1</sup>, Aliya F. Spigelman<sup>1</sup>, Austin Bautista<sup>1</sup>, Ryekjang Kim<sup>1</sup>, Dafna Greitzer-Antes<sup>3</sup>, Jocelyn E. Manning Fox<sup>1</sup>, Herbert Y. Gaisano<sup>3</sup>, Patrick E. MacDonald<sup>1</sup>

<sup>1</sup>Alberta Diabetes Institute and the Department of Pharmacology, University of Alberta, Edmonton, AB, T6G 2E1, Canada

<sup>2</sup>Department of Biochemistry, University of Alberta, Edmonton, AB, T6G 2E1, Canada

<sup>3</sup>Departments of Medicine and Physiology, University of Toronto, Toronto, ON, M5S 1A8, Canada

## Supplementary Figure Legends

### **Figure S1. Fusion events occur at sites of previous or concurrent membrane-resident granules.**

**A)** Membrane-associated granules labelled with NPY-EGFP observed at the beginning of the recording are marked in green (*left*); all subsequent fusion events are shown in red (*center*); fusion events occurring at sites where membrane-localized granules were observed are shown in yellow (*right*). The latter may represent fusion of the membrane-localized granule itself (single yellow event), or of several events at a clustered site (multiple yellow events). Scale bars are 5  $\mu$ m.

### **Figure S2. Upregulation of Kv2.1-WT increases membrane resident granules in ND and T2D.**

**A-B)** Expression of Kv2.1-WT but not Kv2.1- $\Delta$ C318 in ND  $\beta$ -cells (**A**) or T2D  $\beta$ -cells (**B**) increases the density of membrane-resident granules and the proportion of fusion events at sites marked by these. Significance was determined by ANOVA and Bonferroni post-test. \* $p < 0.05$ , \*\* $p < 0.01$  and \*\*\* $p < 0.001$ .

### **Figure S3. Conserved SUMOylation motifs in the N- and C-termini of the Kv2.1 channel.**

**A)** Two previously demonstrated Kv2.1 SUMOylation motifs are conserved across species and between some members of the voltage-dependent  $K^+$  channel family. **B)** Overlay of N-terminal domains of Kv2.1 and Kv1.5 showing location of demonstrated and predicted SUMOylation sites.

### **Figure S4. The impact of Kv2.1 channel manipulation on fusion event density and spatial organization.**

While Kv2.1 knockdown reduces the overall frequency and density of fusion events in human  $\beta$ -cells, the effects of channel up-regulation depend on its SUMOylation status and its ability to form multi-channel clusters. A truncated channel (Kv2.1- $\Delta$ C318) that, while electrically functional, cannot form multi-channel clusters and does not increase membrane resident granule and fusion hotspot density (it may even act as a dominant-negative in some measures). SUMOylated Kv2.1 is sufficient to increase membrane granule density but these do not undergo fusion, resulting in a decreased targeting of granules to fusion hotspots.

Figure. S1

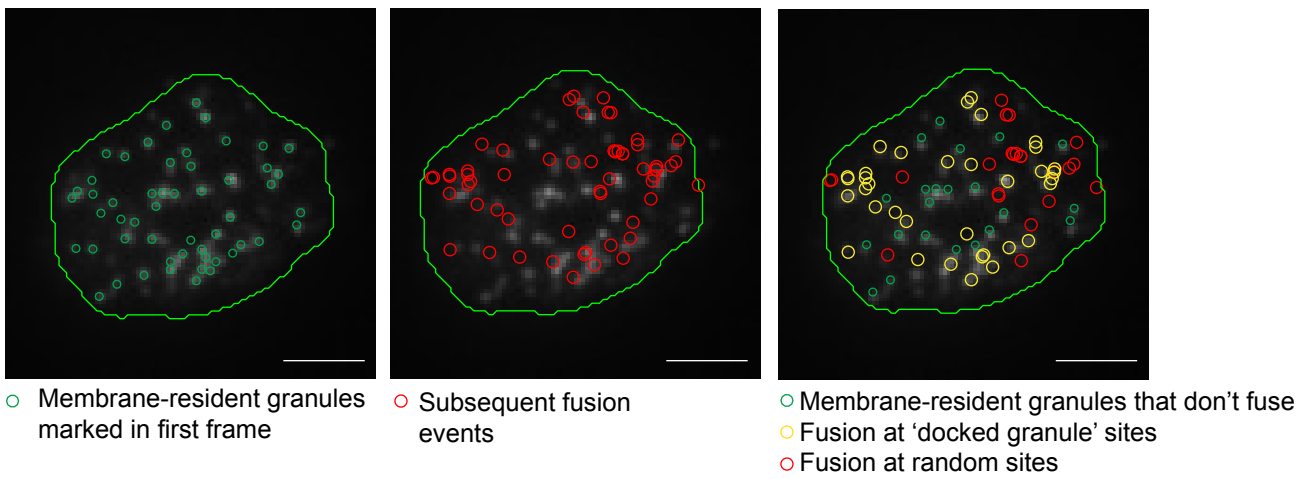

Figure. S2

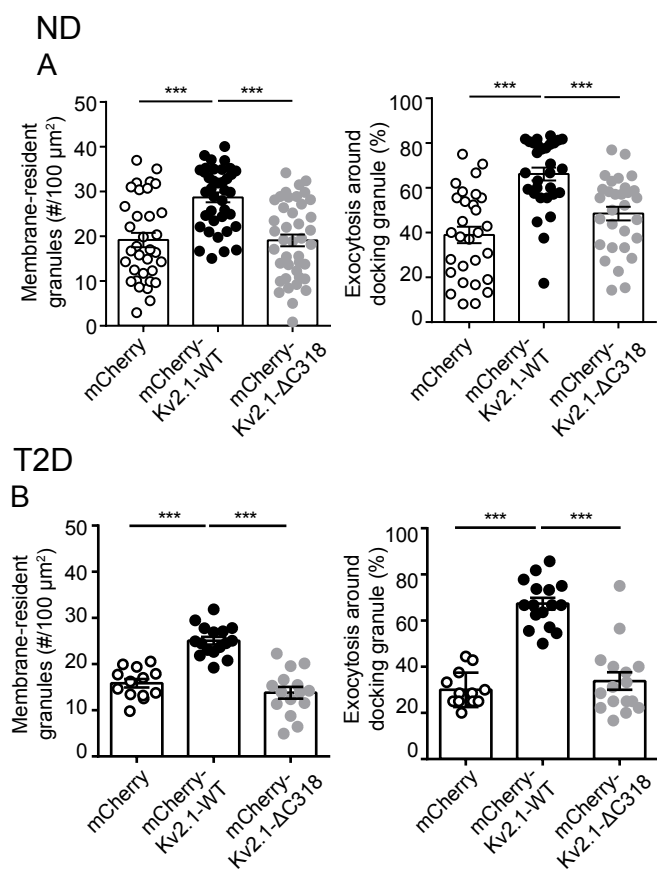

Figure.S3

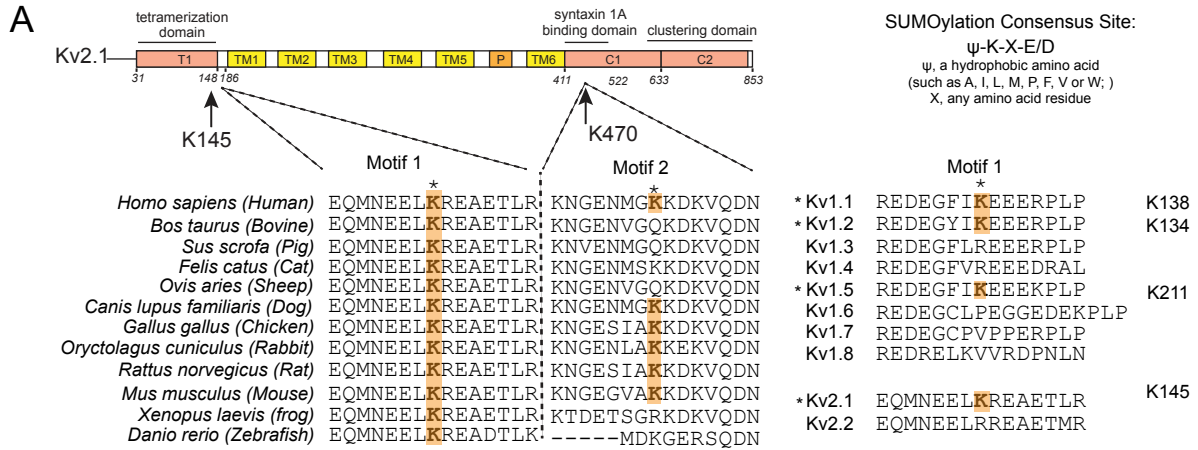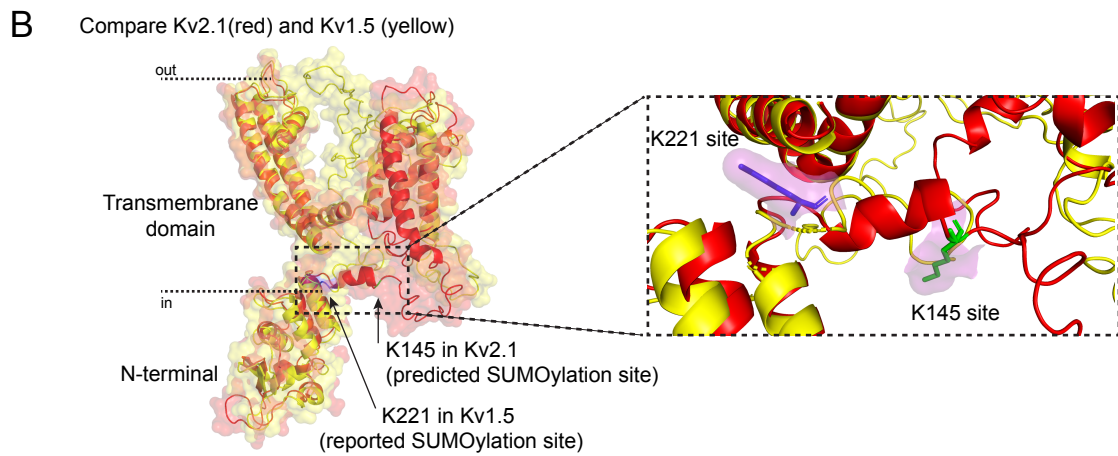

**Figure. S4**

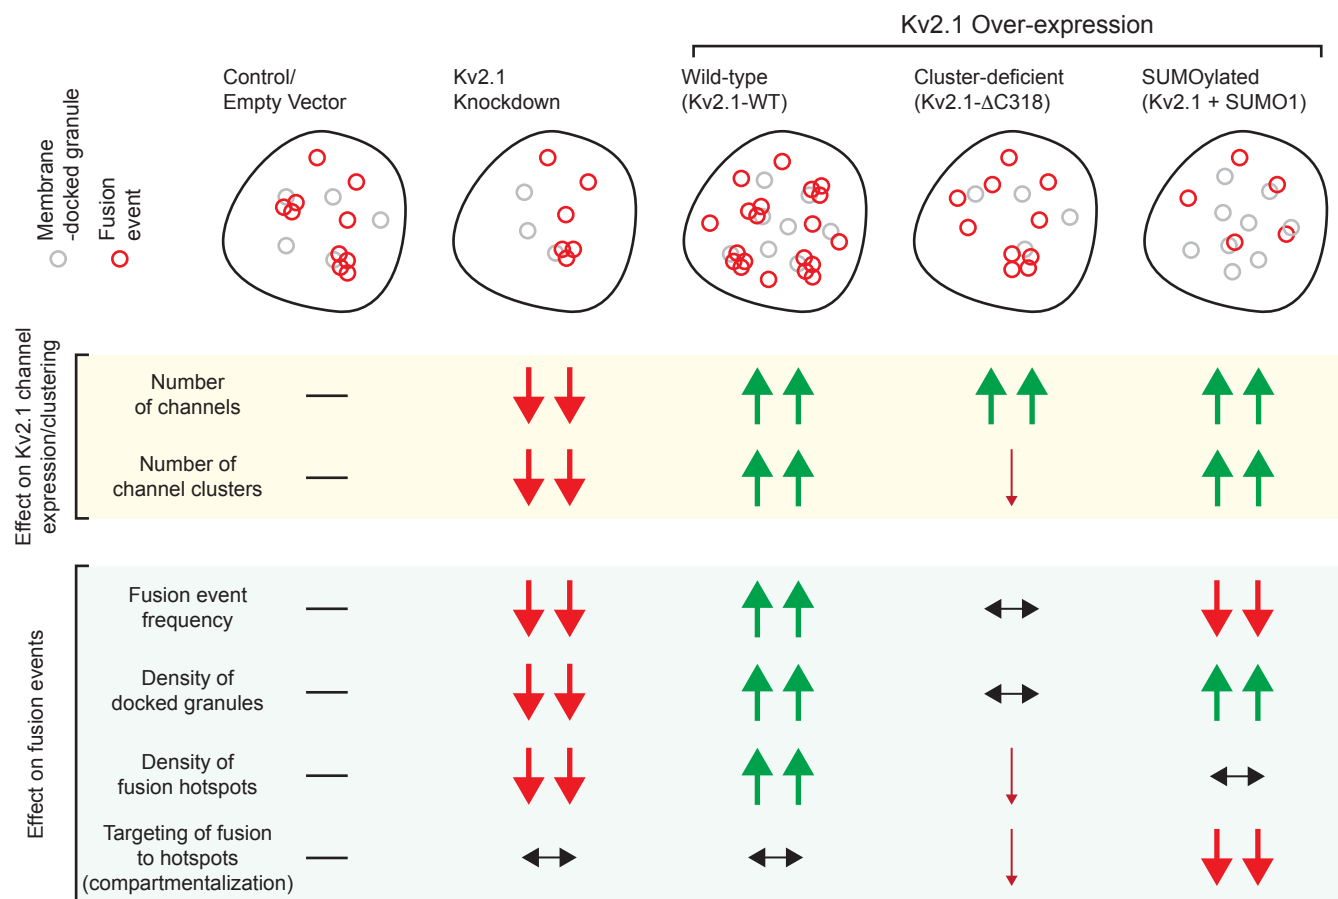

Supplement: jciinsight-4-127896-s221.pdf [file jciinsight-4-127896-s221.pdf]
